# Supplementary material for: Evaluating the importance of fractional Z′ polymorphs in a trifluoromethylated N,N′-diphenyloxalamide derivative
Source: Royal Society of Chemistry journal article supplement (doi:10.1039/c8ce02163e), 2019-01-01
Supplement: c8ce02163e1.pdf [file c8ce02163e1.pdf]

## Electronic Supplementary Information (ESI)

### Evaluating the importance of fractional *Z'* polymorphs in a trifluoromethylated *N, N'*-diphenyloxalamide derivative

Subhrajyoti Bhandary, Piyush Panini, and Deepak Chopra\*

Crystallography and Crystal Chemistry Laboratory, Department of Chemistry, Indian Institute of Science Education and Research Bhopal, Bhopal By-Pass Road, Bhopal, Madhya Pradesh, India-462066.

Email: [dchopra@iiserb.ac.in](mailto:dchopra@iiserb.ac.in); Fax: +91-0755-6692392

#### Synthesis of *N*<sup>1</sup>,*N*<sup>2</sup>-bis(3-(trifluoromethyl)phenyl)oxalamide (TFO) and Crystallization

One equivalent of 3-trifluoromethyl substituted aniline was taken in a round bottomed flask containing dry dichloromethane (DCM) and put on a magnetic stirrer. The mixture was then cooled to 0 °C followed by addition of one and half equivalents of 4-Dimethylaminopyridine (DMAP). Then, two equivalents of oxalyl chloride was added drop wise (very slowly) to the reaction mixture with constant stirring under inert N<sub>2</sub> atmosphere (Scheme S1). The completion of the reaction was monitored with thin layer chromatography. At the end, reaction mixture was extracted by DCM solvent and product was purified by column chromatography.

The purified compound was directly used for crystallization by slow evaporation of in various organic solvents at different conditions. The slow evaporation of DCM-hexane mixture (4:1) at low temperature (4-5°C), methanol (22-25°C) and toluene (22-25°C) results in Form I phase individually.

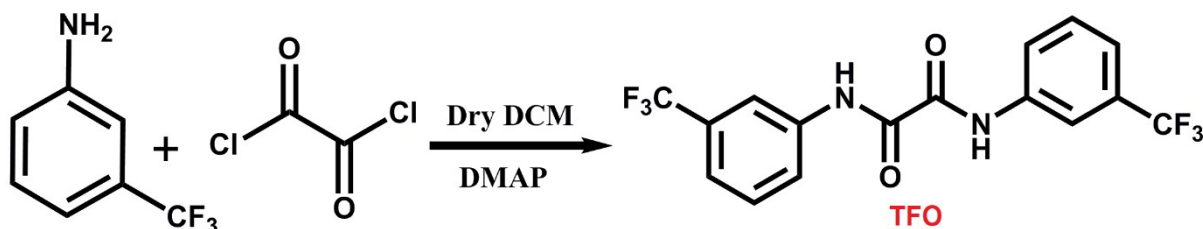

Scheme S1. General routes for synthesis of compound TFO.

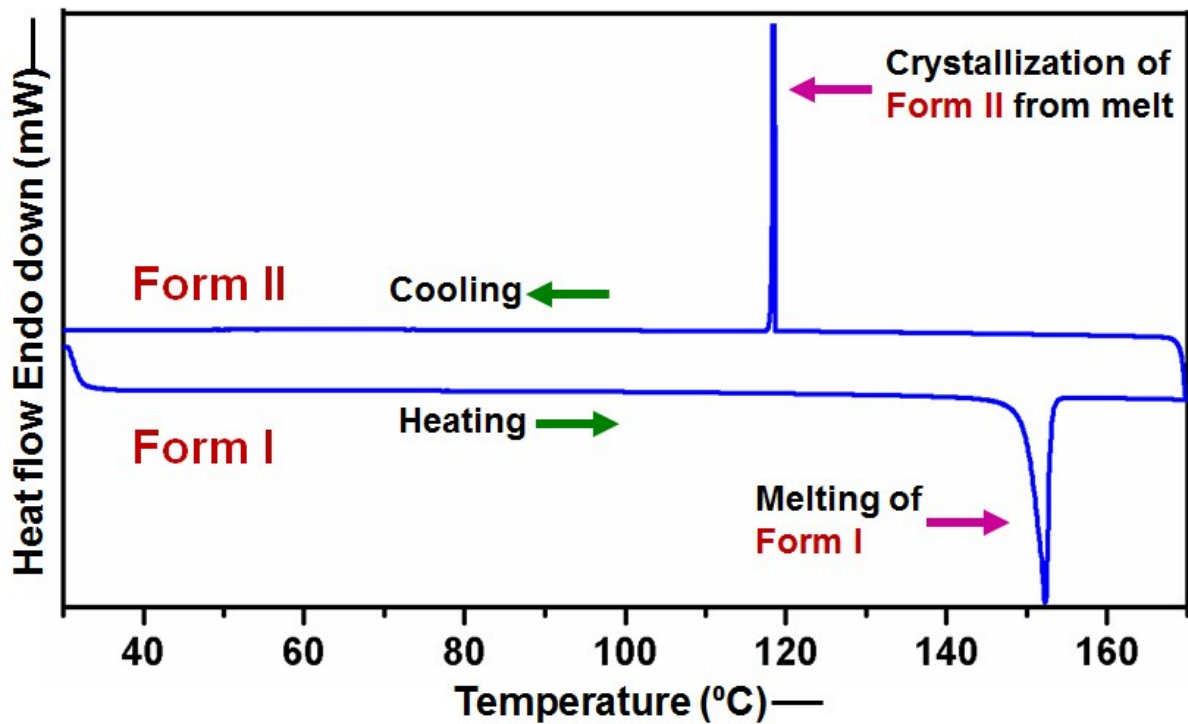

**Fig. S1** Crystallization of Form II via melting of Form I phase in DSC experiment at 2°C/min scan rate.

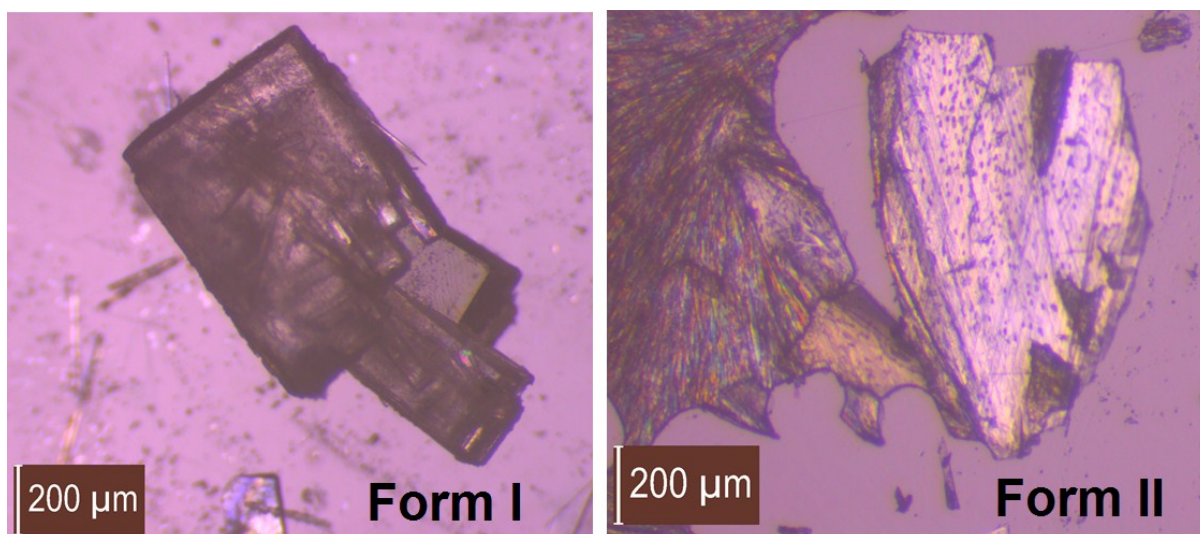

**Fig. S2** Morphologies of Form I (block; left) and Form II (thin plate; right) crystals obtained after solution mediated and melt crystallizations (extracted from the DSC pan), respectively.

## Single crystal X-ray diffraction data collection, structure solution and refinement

Single crystal data of two polymorphs were collected at low temperature on the Bruker D8 VENTURE diffractometer equipped with CMOS type PHOTON 100 detector using monochromated Mo K $\alpha$  radiation ( $\lambda = 0.71073 \text{ \AA}$ ). Unit cell measurement, data collection, integration, scaling and absorption corrections for the crystal were performed using Bruker Apex II software.<sup>1</sup> Data reduction was completed by Bruker SAINT Suite.<sup>2</sup> Multi-scan absorption correction was applied using *SADABS*<sup>3</sup>. Both crystal structures were solved by direct methods using either by *SHELXS-97*<sup>4</sup> and refined by the full matrix least squares method using *SHELXL 2018*<sup>5</sup> present in the program suite *WinGX* (version 2018.1)<sup>6</sup>. All non-hydrogen atoms were refined anisotropically and all hydrogen atoms were positioned geometrically (HFIX 43 for C/ N) and refined using a riding model. *ORTEPs* were generated using *Mercury 3.8 (CCDC)* program.<sup>7</sup> Geometrical calculations were done using *PARST*<sup>8</sup> and *PLATON*<sup>9</sup>.

**Table S1.** Crystallographic data and refinement parameters.

| Identification code  | Form I                                                                                                                                 | Form II                                                                                                                                                 |
|----------------------|----------------------------------------------------------------------------------------------------------------------------------------|---------------------------------------------------------------------------------------------------------------------------------------------------------|
| CCDC                 | 1886184                                                                                                                                | 1886185                                                                                                                                                 |
| Empirical formula    | C <sub>16</sub> H <sub>10</sub> F <sub>6</sub> N <sub>2</sub> O <sub>2</sub>                                                           | C <sub>16</sub> H <sub>10</sub> F <sub>6</sub> N <sub>2</sub> O <sub>2</sub>                                                                            |
| Formula weight       | 376.26                                                                                                                                 | 376.26                                                                                                                                                  |
| Temperature          | 110(2) K                                                                                                                               | 100(2) K                                                                                                                                                |
| Wavelength           | 0.71073 Å                                                                                                                              | 0.71073 Å                                                                                                                                               |
| Crystal system       | Monoclinic                                                                                                                             | Triclinic                                                                                                                                               |
| Space group          | <i>P</i> 2 <sub>1</sub> / <i>c</i>                                                                                                     | <i>P</i> -1                                                                                                                                             |
| Unit cell dimensions | a = 5.0637(4) Å<br>b = 4.9677(4) Å<br>c = 29.092(2) Å<br>$\alpha = 90^\circ$ .<br>$\beta = 94.332(2)^\circ$ .<br>$\gamma = 90^\circ$ . | a = 4.9806(4) Å<br>b = 11.5051(8) Å<br>c = 14.8528(12) Å<br>$\alpha = 68.367(5)^\circ$ .<br>$\beta = 80.383(4)^\circ$ .<br>$\gamma = 78.374(4)^\circ$ . |
| Volume               | 729.71(10) Å <sup>3</sup>                                                                                                              | 770.89(11) Å <sup>3</sup>                                                                                                                               |
| <i>Z</i> '           | 1/2                                                                                                                                    | 1/2+1/2                                                                                                                                                 |
| <i>Z</i>             | 2                                                                                                                                      | 2                                                                                                                                                       |
| Density (calculated) | 1.712 Mg/m <sup>3</sup>                                                                                                                | 1.621 Mg/m <sup>3</sup>                                                                                                                                 |

|                                   |                                             |                                             |
|-----------------------------------|---------------------------------------------|---------------------------------------------|
| Absorption coefficient            | 0.165 mm <sup>-1</sup>                      | 0.157 mm <sup>-1</sup>                      |
| F(000)                            | 380                                         | 380                                         |
| Crystal size                      | 0.420 x 0.280 x 0.120 mm <sup>3</sup>       | 0.500 x 0.290 x 0.130 mm <sup>3</sup>       |
| Theta range for data collection   | 2.809 to 30.497°.                           | 2.810 to 30.146°.                           |
| Index ranges                      | -7<=h<=7, -7<=k<=6, -40<=l<=41              | -7<=h<=7, -16<=k<=16, -20<=l<=20            |
| Reflections collected             | 11752                                       | 25315                                       |
| Independent reflections           | 2200 [R(int) = 0.0275]                      | 4468 [R(int) = 0.0658]                      |
| Completeness to theta = 25.242°   | 99.8 %                                      | 99.9 %                                      |
| Refinement method                 | Full-matrix least-squares on F <sup>2</sup> | Full-matrix least-squares on F <sup>2</sup> |
| Data / restraints / parameters    | 2200 / 0 / 118                              | 4468 / 0 / 235                              |
| Goodness-of-fit on F <sup>2</sup> | 1.068                                       | 1.018                                       |
| Final R indices [I>2sigma(I)]     | R1 = 0.0369, wR2 = 0.0984                   | R1 = 0.0501, wR2 = 0.1074                   |
| R indices (all data)              | R1 = 0.0413, wR2 = 0.1021                   | R1 = 0.0843, wR2 = 0.1221                   |
| Absorption correction             | Semi-empirical from equivalents             | Semi-empirical from equivalents             |
| Max. and min. transmission        | 0.7461 and 0.7001                           | 0.7460 and 0.6829                           |
| Largest diff. peak and hole       | 0.406 and -0.365 e.Å <sup>-3</sup>          | 0.580 and -0.290 e.Å <sup>-3</sup>          |

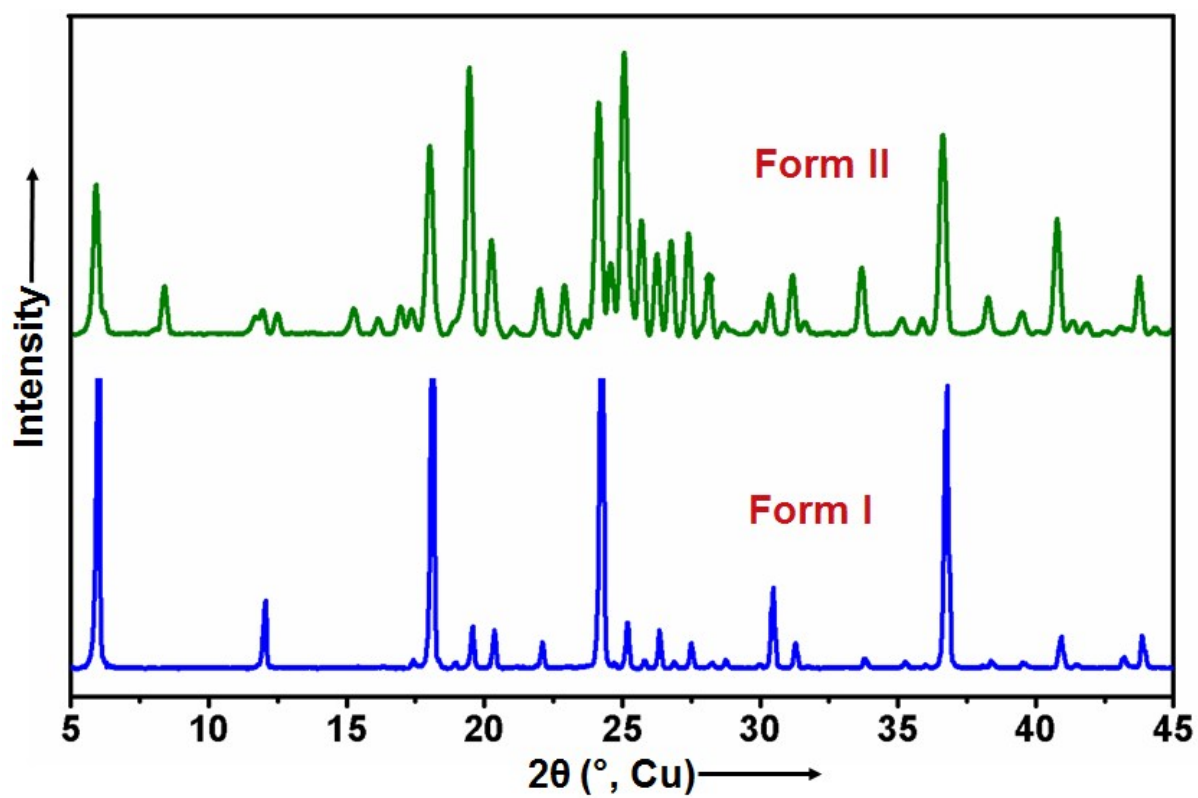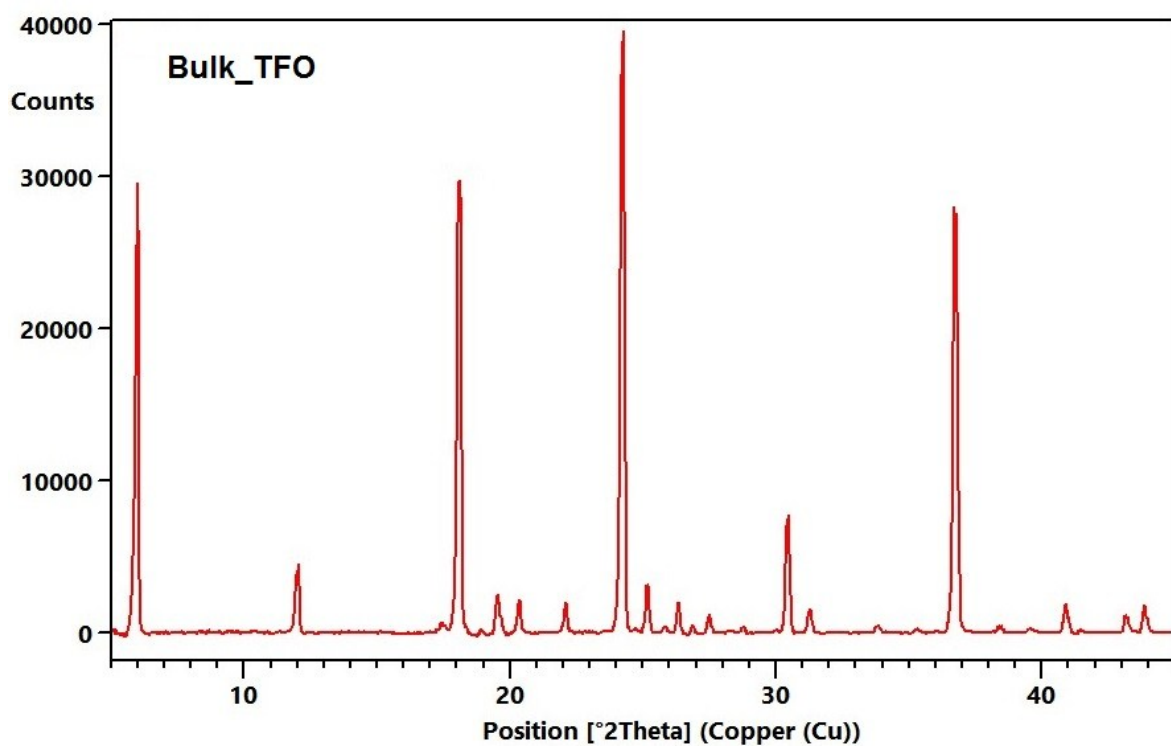

**Fig. S3** Overlay of experimental powder X-ray diffraction patterns of dimorphs (up) and bulk (below) synthesised compound **TFO**. The bulk is a representative of Form I phase.

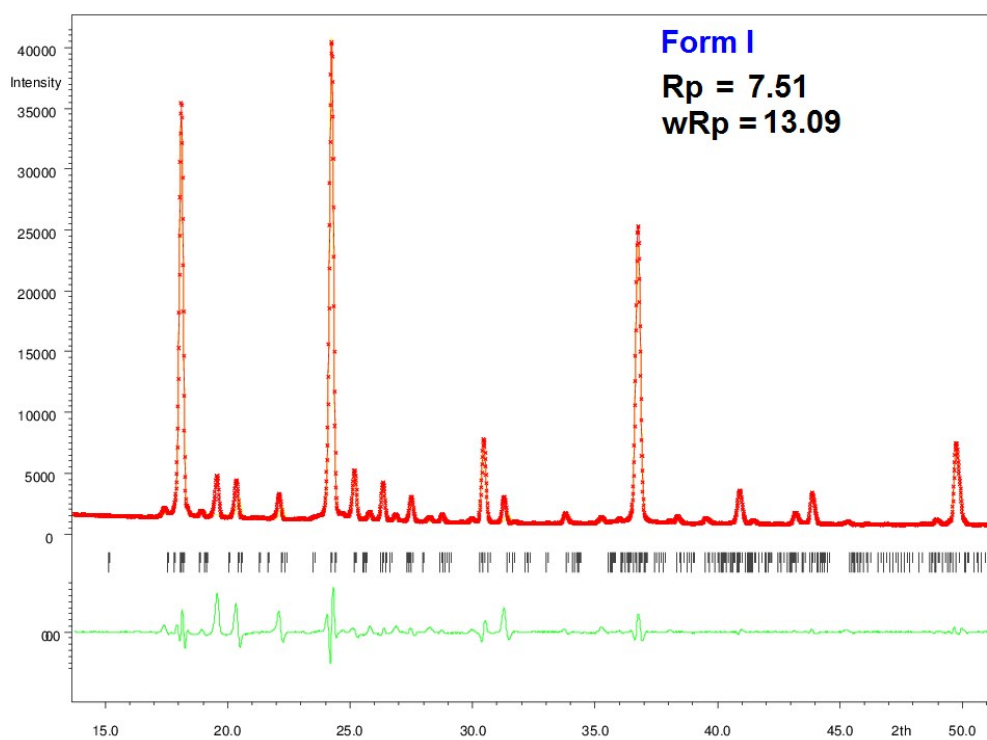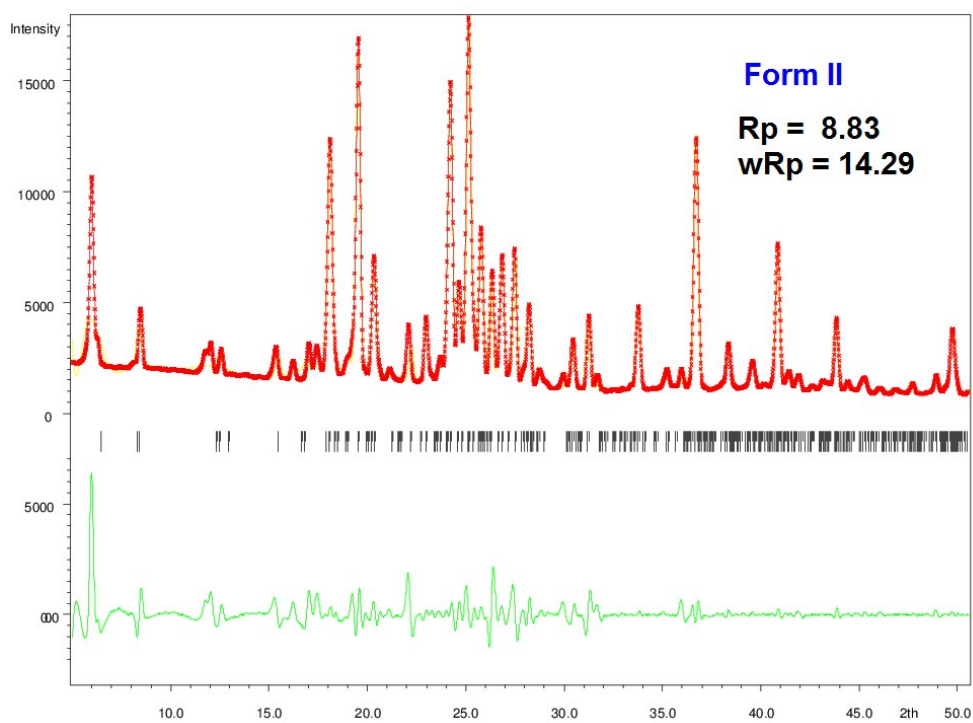

**Fig. S4** Results of the profile fitting refinements (using Jana 2006<sup>11</sup>), performed for Form I (up) with its recorded powder pattern and Form II (below) with its recorded powder pattern.

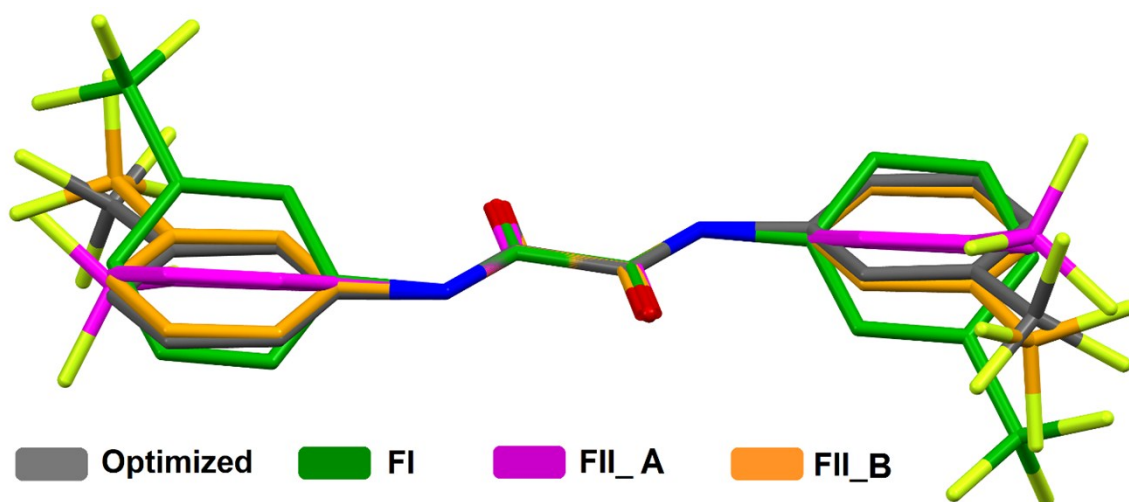

**Fig. S5** Overlay of TFO molecules in gas phase and crystal conformations of two polymorphs.

**Table S2.** List of intra- and intermolecular interactions present in both polymorphic forms.

| motif                                 | Symmetry            | D...A(Å) | H...A(Å) | <D-H...A(°) |
|---------------------------------------|---------------------|----------|----------|-------------|
| <b>Form I</b>                         |                     |          |          |             |
| C2-H2...O1                            | x, y, z (intra)     | 2.937(1) | 2.40     | 109         |
| N1-H1...O1                            | x+1, y, z           | 2.905(1) | 2.01     | 144         |
| F1...C4( $\pi$ )                      |                     | 3.242(1) |          |             |
| $\pi$ ... $\pi$ stacking              |                     | 5.064(1) |          |             |
| C4-H3...F2                            | x, y+1, z           | 3.709(1) | 2.79     | 143         |
| C5-H4...F1                            | x+1, y+1, z         | 3.458(1) | 2.60     | 136         |
| C6-H5...O1                            |                     | 3.483(1) | 2.73     | 127         |
| C4-H3...F2                            | -x+2, y+1/2, -z+3/2 | 3.458(1) | 2.56     | 140         |
| $\pi$ ... $\pi$ ring stacking (Cg-Cg) | x, y-1, z           | 4.968(2) | -        | -           |
| F3...F2                               | -x+1, y+1/2, -z+3/2 | 3.122(1) | -        | -           |
| F3...F1                               |                     | 3.112(1) | -        | -           |
| <b>Form II</b>                        |                     |          |          |             |
| C2-H2...O1                            | x, y, z (intra)     | 2.937(2) | 2.40     | 109         |
| C10-H13...O2                          |                     | 2.891(2) | 2.20     | 120         |
| F4...C4( $\pi$ )                      | x, y, z             | 3.162(3) | -        | -           |
| F4...F3                               |                     | 3.308(2) | -        | -           |
| C10-H13...F3                          |                     | 4.172(2) | 3.44     | 126         |
| N1-H1...O1                            | x-1, y, z           | 2.881(2) | 2.03     | 138         |
| F3...C4( $\pi$ )                      |                     | 3.211(2) | -        | -           |
| $\pi$ ... $\pi$ stacking              |                     | 4.981(3) | -        | -           |

|                            |                  |          |      |     |
|----------------------------|------------------|----------|------|-----|
| C4-H4···O2                 | x-1, y, z        | 3.401(3) | 2.34 | 168 |
| C5-H5···F4                 |                  | 3.539(2) | 2.55 | 151 |
| C6-H6···F5                 | -x, -y+2, -z     | 3.755(3) | 2.69 | 168 |
| C6-H6···F6                 |                  | 3.535(3) | 2.67 | 136 |
| C12-H11···O1               |                  | 3.602(2) | 2.56 | 161 |
| C12-H11···F1               |                  | 3.375(2) | 2.34 | 160 |
| N2-H2A···F3                | -x+1, -y+2, -z+1 | 3.205(2) | 2.22 | 160 |
| C14-H9···F3                |                  | 3.461(2) | 2.55 | 142 |
| Molecular stacking         | -x+1, -y+2, -z+1 | 3.356(2) | -    | -   |
| F5···C8( $\pi$ )           | -x+1, -y+2, -z   | 2.926(2) | -    | -   |
| C13( $\pi$ )···C2( $\pi$ ) |                  | 3.353(2) | -    | -   |

## Computational Details

### Geometry optimization and MESP plot

The crystal geometry of the molecule TFO (full molecule) was optimized at M06-2X/ 6-311g(d, p) level of theory using *Gaussian 09* software<sup>10</sup> and gas phase geometry was used for mapping the MESP plot.

### Coordinates of gas optimized geometry for molecule TFO:

\*\*\*\*\*

36

Molecule Name

F -6.496400 -1.132400 -1.244600

F -5.489900 -2.018400 0.441500

F -7.145300 -0.667500 0.753500

O -1.165400 -1.296900 0.015200

N -1.479000 0.985100 -0.001300

H -0.912700 1.826700 -0.011100

C -6.059500 -0.892000 0.000500

C -5.112700 0.274500 0.032100



|   |           |           |           |
|---|-----------|-----------|-----------|
| C | -3.744600 | 0.036500  | 0.023400  |
| H | -3.358600 | -0.971400 | 0.039300  |
| C | -2.876800 | 1.129600  | 0.003100  |
| C | -0.757400 | -0.154500 | 0.004500  |
| C | -5.636100 | 1.561200  | 0.020400  |
| H | -6.707900 | 1.712400  | 0.035400  |
| C | -4.761100 | 2.639600  | -0.000200 |
| H | -5.145700 | 3.651600  | -0.006500 |
| C | -3.391100 | 2.428000  | -0.009300 |
| H | -2.710200 | 3.272100  | -0.023200 |
| F | 6.496500  | 1.132400  | 1.244500  |
| F | 5.489900  | 2.018400  | -0.441500 |
| F | 7.145300  | 0.667600  | -0.753500 |
| O | 1.165400  | 1.296900  | -0.015000 |
| N | 1.479000  | -0.985100 | 0.001300  |
| H | 0.912700  | -1.826700 | 0.011100  |
| C | 6.059500  | 0.892000  | -0.000600 |
| C | 5.112700  | -0.274500 | -0.032200 |
| C | 3.744600  | -0.036500 | -0.023400 |
| H | 3.358600  | 0.971400  | -0.039200 |
| C | 2.876800  | -1.129600 | -0.003100 |
| C | 0.757500  | 0.154500  | -0.004400 |
| C | 5.636100  | -1.561200 | -0.020500 |
| H | 6.707900  | -1.712400 | -0.035600 |
| C | 4.761100  | -2.639600 | 0.000200  |
| H | 5.145700  | -3.651600 | 0.006400  |
| C | 3.391100  | -2.428000 | 0.009300  |
| H | 2.710200  | -3.272100 | 0.023100  |

\*\*\*\*\*

### **Energy Framework and energy decomposition calculation**

The pairwise intermolecular interaction energies in crystal were computed from CE-B3LYP/6-31g(d,p) molecular wave functions calculations by *CrystalExplorer17.5*. The total interaction energy in each molecular pair in crystal was estimated by summing up the electrostatic, polarization, dispersion and exchange-repulsion terms. Absolute values of decomposed energy can be obtained from the scaling scheme [Reference number 23a in the main manuscript]. The energy cut-off and tube size were 5 kJ/mol and 80 respectively, for generating the energy framework of two polymorphs.

## Output of interaction energy calculations and energy decompositions for dimorphs-

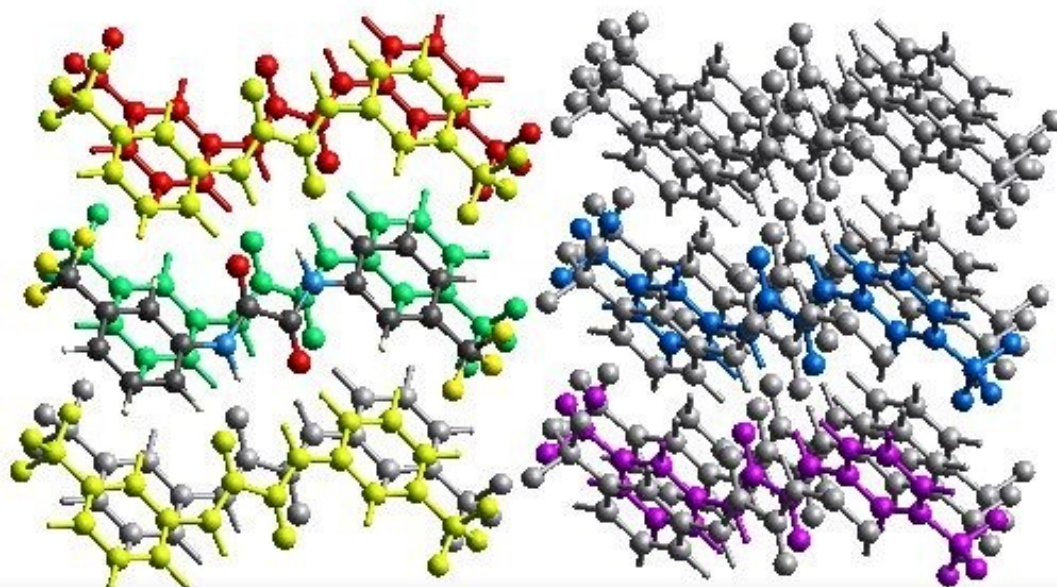

Information

### Form I

Crystal Atoms Surface Energies

Interaction Energies (kJ/mol)  
R is the distance between molecular centroids (mean atomic position) in Å.

Total energies, only reported for two benchmarked energy models, are the sum of the four energy components, scaled appropriately (see the scale factor table below)

|  | N | Symop             | R     | Electron Density | E_ele | E_pol | E_dis | E_rep | E_tot |
|--|---|-------------------|-------|------------------|-------|-------|-------|-------|-------|
|  | 1 | x, y, z           | 7.09  | B3LYP/6-31G(d,p) | -3.5  | -4.0  | -31.0 | 19.3  | -21.7 |
|  | 2 | x, y, z           | 5.06  | B3LYP/6-31G(d,p) | -46.6 | -9.6  | -59.2 | 63.6  | -68.6 |
|  | 1 | x, y, z           | 4.97  | B3LYP/6-31G(d,p) | -9.1  | -2.4  | -68.7 | 36.5  | -48.7 |
|  | 1 | -x, y+1/2, -z+1/2 | 14.76 | B3LYP/6-31G(d,p) | -1.7  | -0.4  | -7.9  | 3.2   | -7.1  |
|  | 1 | -x, y+1/2, -z+1/2 | 15.24 | B3LYP/6-31G(d,p) | 1.2   | -0.2  | -5.3  | 0.8   | -3.1  |

Scale factors for benchmarked energy models  
See Mackenzie et al. IUCrJ (2017)

| Energy Model                                     | k_ele | k_pol | k_disp | k_rep |
|--------------------------------------------------|-------|-------|--------|-------|
| CE-HF ... HF/3-21G electron densities            | 1.019 | 0.651 | 0.901  | 0.811 |
| CE-B3LYP ... B3LYP/6-31G(d,p) electron densities | 1.057 | 0.740 | 0.871  | 0.618 |

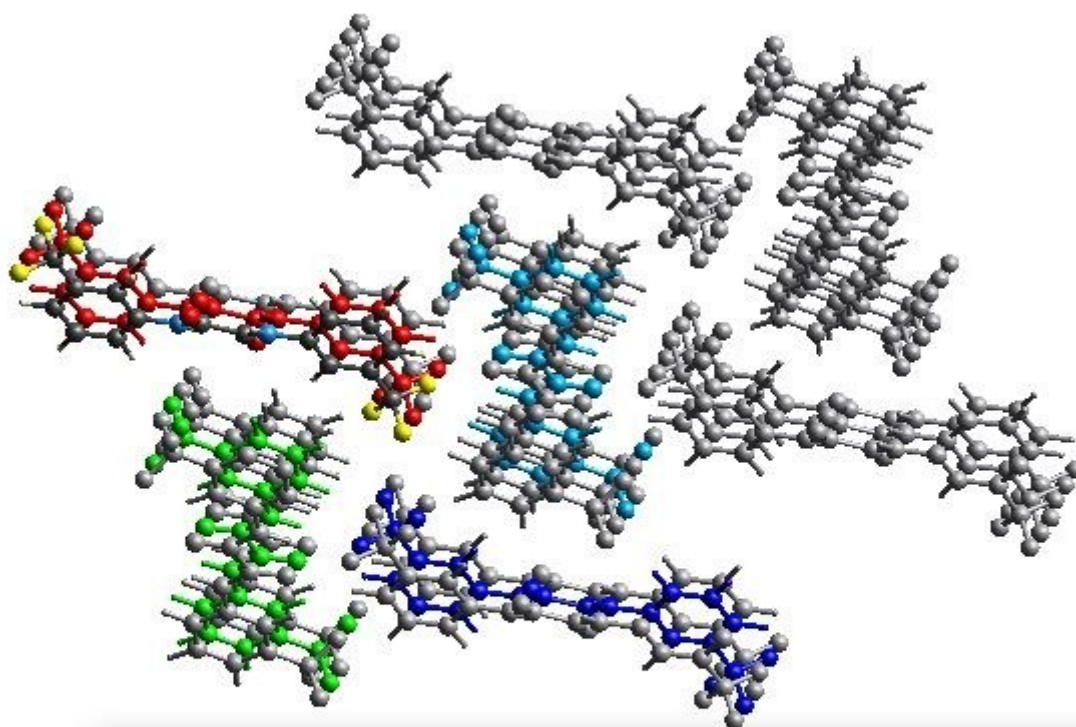

Information

## Form II

Crystal   Atoms   Surface   Energies

### Interaction Energies (kJ/mol)

R is the distance between molecular centroids (mean atomic position) in Å.

Total energies, only reported for two benchmarked energy models, are the sum of the four energy components, scaled appropriately (see the scale factor table below)

|  | N | Symop   | R     | Electron Density | E_ele | E_pol | E_dis | E_rep | E_tot |
|--|---|---------|-------|------------------|-------|-------|-------|-------|-------|
|  | 1 | x, y, z | 4.98  | B3LYP/6-31G(d,p) | -42.9 | -9.0  | -58.6 | 60.0  | -66.1 |
|  | 0 | -       | 10.68 | B3LYP/6-31G(d,p) | -17.7 | -3.1  | -21.7 | 21.5  | -26.7 |
|  | 0 | x, y, z | 4.98  | B3LYP/6-31G(d,p) | -7.4  | -2.3  | -88.3 | 44.4  | -59.0 |
|  | 1 | -       | 7.96  | B3LYP/6-31G(d,p) | -4.1  | -1.2  | -33.7 | 16.1  | -24.6 |
|  | 0 | x, y, z | 14.86 | B3LYP/6-31G(d,p) | 0.3   | -0.1  | -2.3  | 0.0   | -1.7  |
|  | 1 | -       | 11.74 | B3LYP/6-31G(d,p) | -0.4  | -0.5  | -9.5  | 3.0   | -7.2  |
|  | 1 | x, y, z | 14.85 | B3LYP/6-31G(d,p) | 1.8   | -0.2  | -4.7  | 0.4   | -2.1  |
|  | 0 | -       | 10.67 | B3LYP/6-31G(d,p) | -11.7 | -1.8  | -19.9 | 14.0  | -22.4 |
|  | 0 | -       | 11.82 | B3LYP/6-31G(d,p) | -1.9  | -0.5  | -6.7  | 1.4   | -7.4  |

### Scale factors for benchmarked energy models

See Mackenzie et al. IUCrJ (2017)

| Energy Model                                     | k_ele | k_pol | k_disp | k_rep |
|--------------------------------------------------|-------|-------|--------|-------|
| CE-HF ... HF/3-21G electron densities            | 1.019 | 0.651 | 0.901  | 0.811 |
| CE-B3LYP ... B3LYP/6-31G(d,p) electron densities | 1.057 | 0.740 | 0.871  | 0.618 |

## References

1. Apex2, Version 2 User Manual, M86-E01078, Bruker Analytical X-ray Systems Madison, WI, 2006.
2. Siemens, SMART System, Siemens Analytical X-ray Instruments Inc. Madison, MI, 1995.
3. G. M. Sheldrick, SADABS, Bruker AXS, Inc.: Madison, WI, 2007.
4. G. M. Sheldrick, *Acta Crystallogr.*, 2008, **A64**, 112.
5. G. M. Sheldrick, *Acta Crystallogr.*, 2015, **C71**, 3.
6. L. J. Farrugia, *J. Appl. Crystallogr.*, 1999, **32**, 837.
7. C. F. Macrae, I. J. Bruno, J. A. Chisholm, P. R. Edgington, P. McCabe, E. Pidcock, L. Rodriguez-Monge, R. Taylor, J. van de Streek and P. A. Wood, *J. Appl. Crystallogr.*, 2008, **41**, 466. [www.ccdc.cam.ac.uk/mercury](http://www.ccdc.cam.ac.uk/mercury)
8. M. Nardelli, *J. Appl. Crystallogr.*, 1995, **28**, 659.
9. A. L. Spek, *Acta Crystallogr.*, 2009, **D65**, 148.
10. M. J. Frisch, G. W. Trucks, H. B. Schlegel, G. E. Scuseria, M. A. Robb, J. R. Cheeseman, G. Scalmani, V. Barone, B. Mennucci, G. A. Petersson, H. Nakatsuji, M. Caricato, X. Li, H. P. Hratchian, A. F. Izmaylov, J. Bloino, G. Zheng, J. L. Sonnenberg, M. Hada, M. Ehara, K. Toyota, R. Fukuda, J. M. Hasegawa-Ishida, T. Nakajima, Y. Honda, O. Kitao, H. Nakai, T. Vreven, J. A. Jr. Montgomery, J. E. Peralta, F. Ogliaro, M. Bearpark, J. J. Heyd, E. Brothers, K. N. Kudin, V. N. Staroverov, R. Kobayashi, J. Normand, K. Raghavachari, A. Rendell, J. C. Burant, S. S. Iyengar, J. Tomasi, M. Cossi, N. Rega, J. M. Millam, M. Klene, J. E. Knox, J. B. Cross, V. Bakken, C. Adamo, J. Jaramillo, R. Gomperts, R. E. Stratmann, O. Yazyev, A. J. Austin, R. Cammi, C. Pomelli, J. W. Ochterski, R. L. Martin, K. Morokuma, V. G. Zakrzewski, G. A. Voth, P. Salvador, J. J. Dannenberg, S. Dapprich, A. D. Daniels, Ö. Farkas, J. B. Foresman, J. V. Ortiz, J. Cioslowski and D. J. Fox, *Gaussian 09*, Revision D.01, Gaussian, Inc., Wallingford, CT, 2009.
11. V. Petricek, M. Dusek, and L. Palatinus, *Z. Kristallogr.* 2014, **229**, 345.
